# Supplementary material
Source: HighWire-hosted journal article supplement (http://jmg.bmjjournals.com/highwire/filestream/160639/field_highwire_adjunct_files/3/Supplemental_Figure_3.pdf)

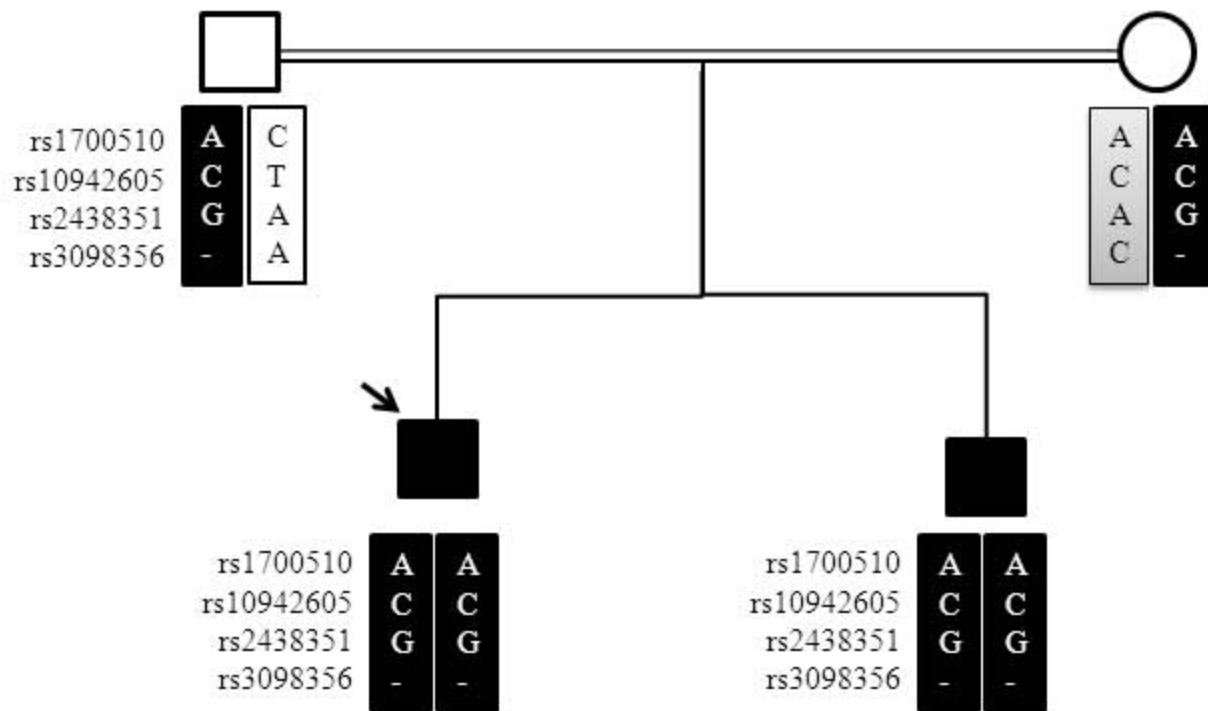

Supplement: Supplemental_Figure_3.pdf [file Supplemental_Figure_3.pdf]
